# Supplementary material
Source: Springer Nature journal article supplement (https://www.springermedizin.de/resource/supplementary/13020_2014_222_MOESM2_ESM.pdf/9641232)

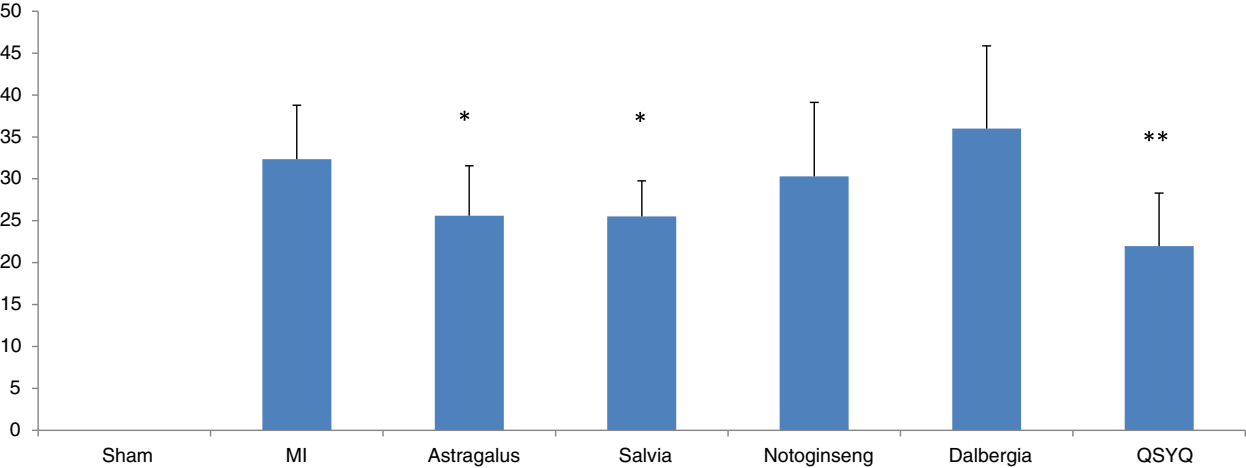

\*: significant compared to MI group ( $P < 0.05$ )

\*\* : strongly significant compared to MI group ( $P < 0.01$ )

Supplement: MOESM2 [file 9641232]
